# Supplementary material
Source: publisher figshare collection journal article supplement (https://tandf.figshare.com/articles/dataset/_/26992808)
Supplement: Supplementary file 1 [file 1]

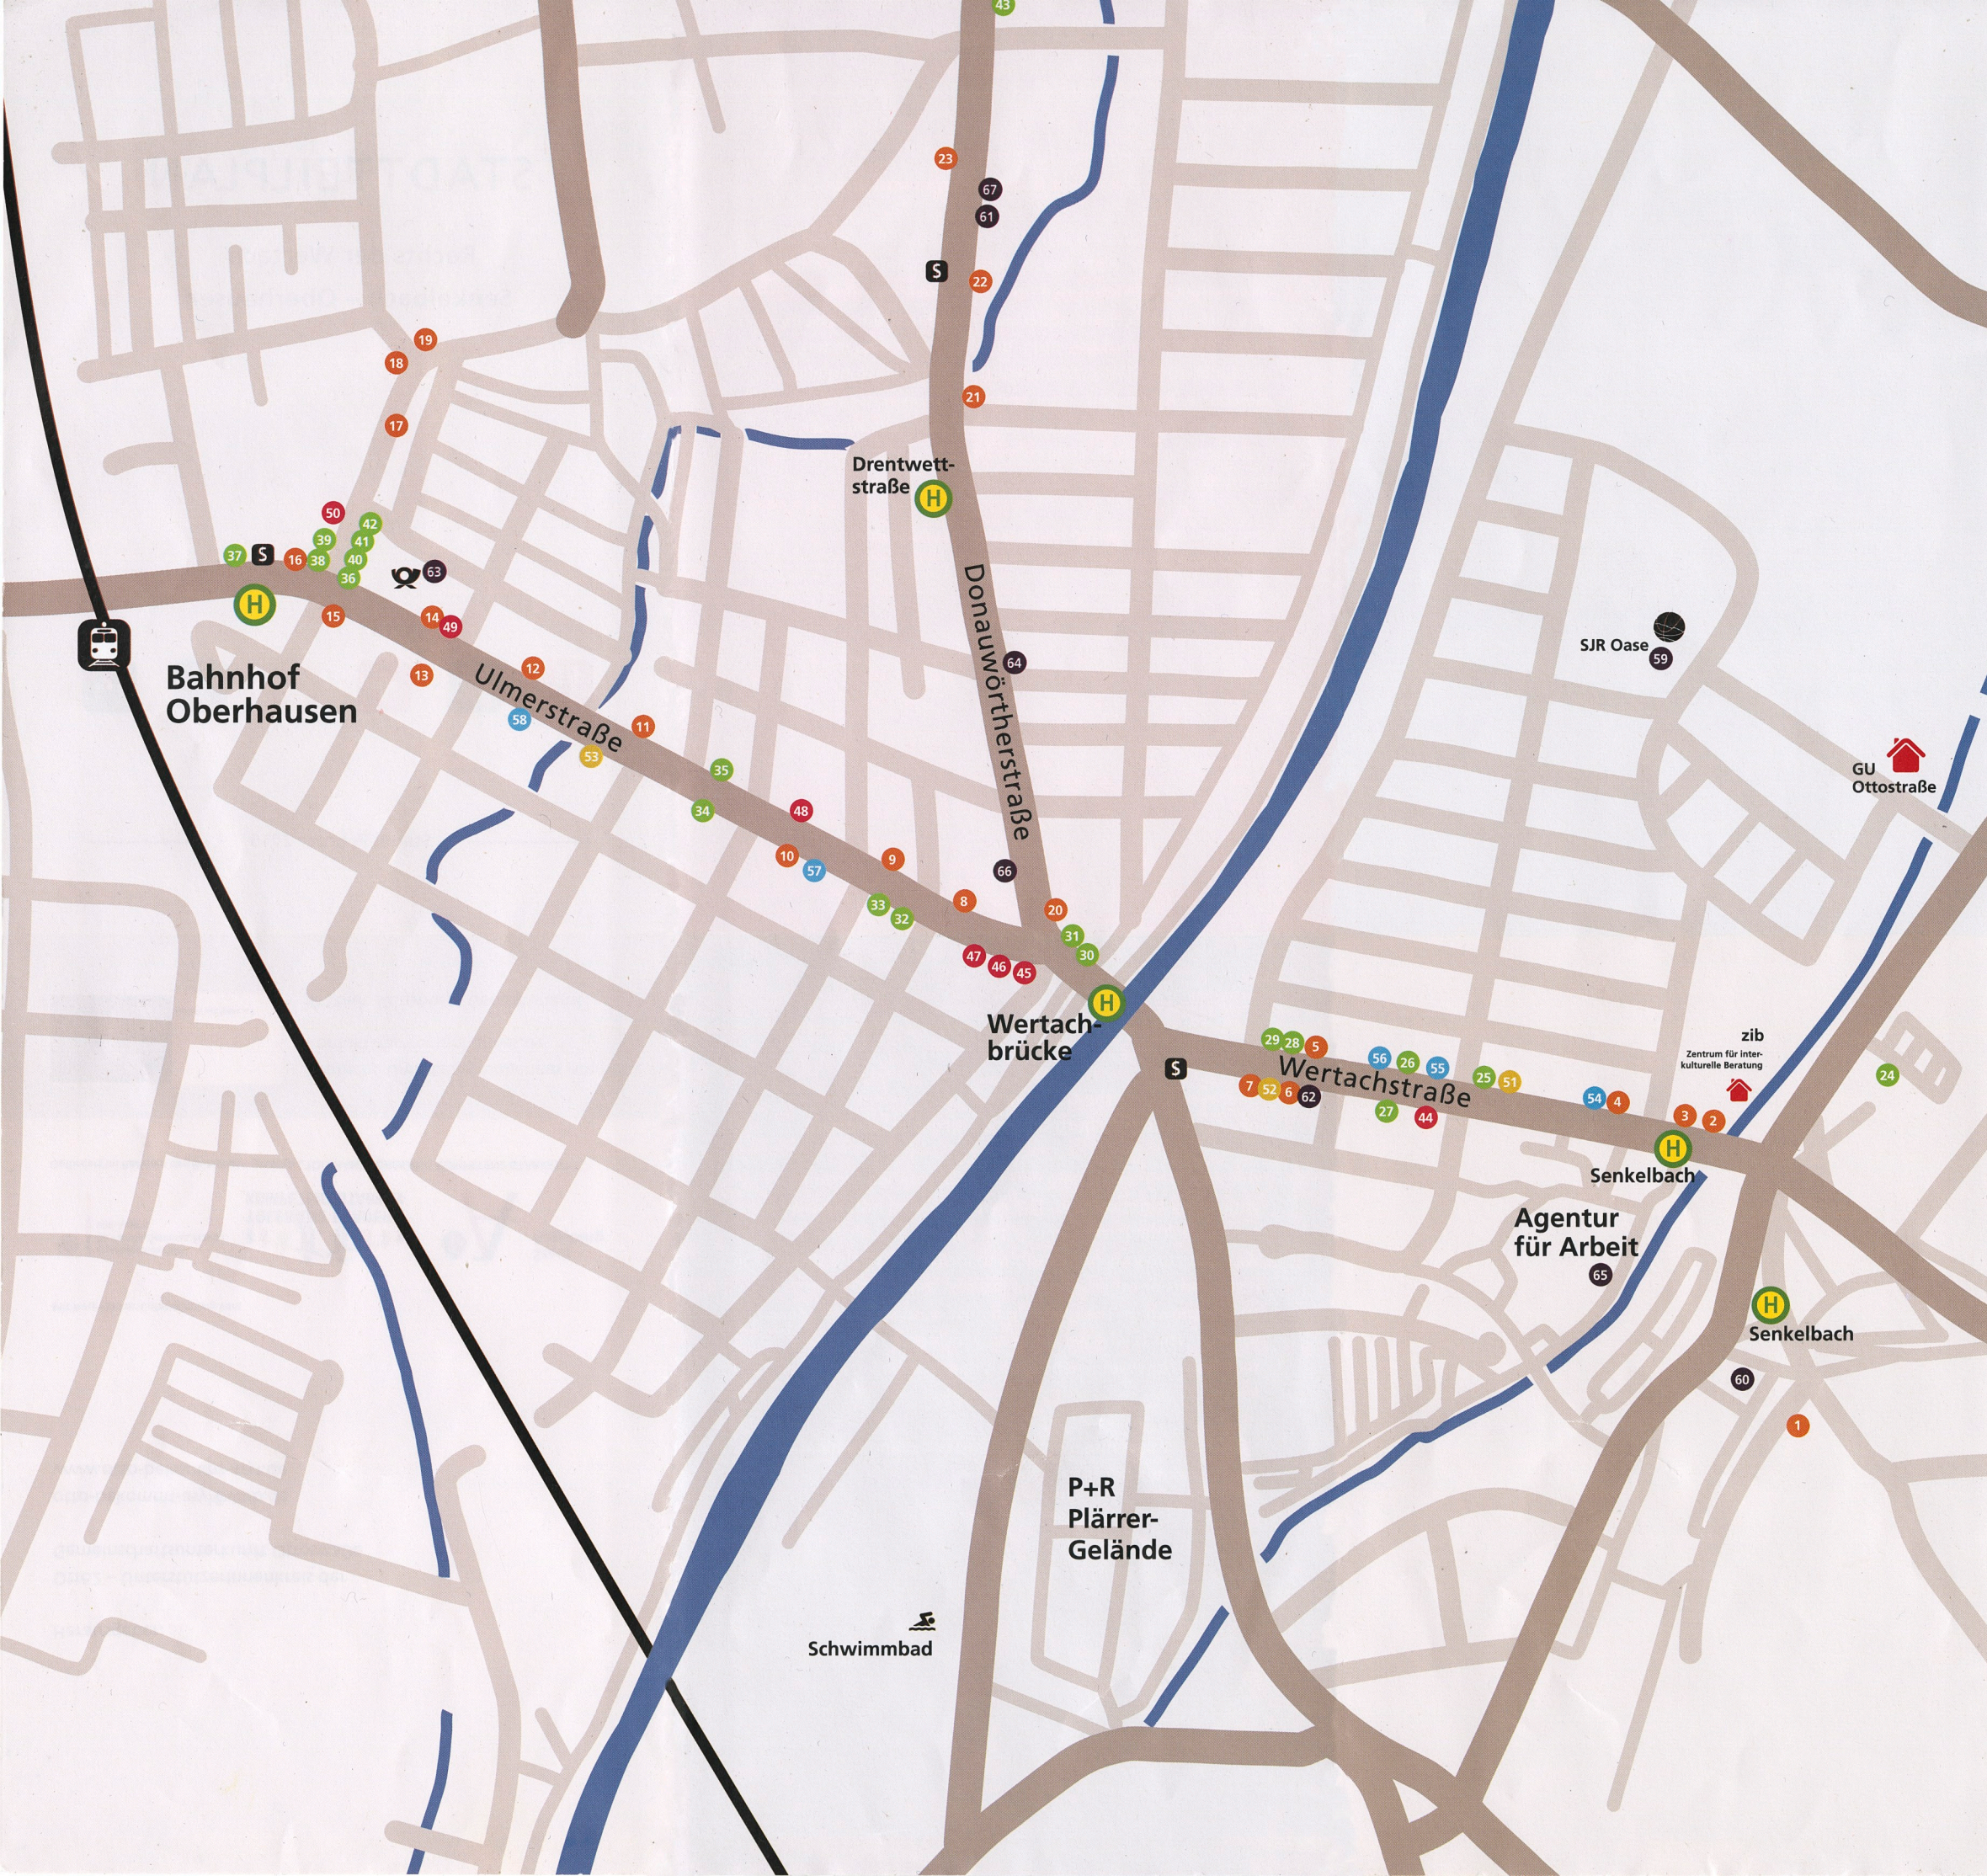

**Gastronomie**  
restaurants & take away Food  
restaurants, gastronomie

رستوران

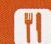

- |                                  |                          |
|----------------------------------|--------------------------|
| 1 deutsches Brauhaus             | 13 türkisches Restaurant |
| 2 Bar                            | 14 Fast-Food-Restaurant  |
| 3 Pizza/Kebab, türkisch          | 15 deutsches Restaurant  |
| 4 Pizzeria                       | 16 türkisches Restaurant |
| 5 türkisches Restaurant/Bäckerei | 17 türkisches Restaurant |
| 6 Asia-Imbiss                    | 18 Bar                   |
| 7 türkisches Restaurant          | 19 Bar                   |
| 8 Bar                            | 20 Pizza Lieferdienst    |
| 9 türkisches Restaurant          | 21 türkisches Restaurant |
| 10 türkisches Cafe               | 22 Pizzeria              |
| 11 deutsches Restaurant          | 23 Pizzeria              |
| 12 Restaurant, balkan/bayerisch  |                          |

**Lebensmittel, Supermarkt**  
groceries, supermarkets  
supermarchés, magasin d'alimentation

ماکولات , سوپر مارکیٹ

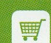

- |                                |                            |
|--------------------------------|----------------------------|
| 24 Supermarkt                  | 34 deutscher Metzger       |
| 25 deutsche Bäckerei           | 35 Bäckerei                |
| 26 1-Euro-Discounter           | 36 asiatische Lebensmittel |
| 27 türkische Lebensmittel      | 37 Supermarkt              |
| 28 osteuropäische Lebensmittel | 38 Drogerie                |
| 29 Tabak/Kiosk                 | 39 Supermarkt              |
| 30 türkischer Metzger          | 40 Bäckerei                |
| 31 Tabak/Kiosk                 | 41 arabische Lebensmittel  |
| 32 Tabak/Kiosk                 | 42 Kiosk/Tabak             |
| 33 türkische Lebensmittel      | 43 Supermarkt              |

**Apotheke, Arzt**  
drugstore, pharmacy, doctors  
médécins, pharmacies

صيدلية , طبيب

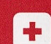

- |                     |                                      |
|---------------------|--------------------------------------|
| 44 Innere Medizin   | 48 Allgemeinmedizin, Hautarzt,       |
| 45 Apotheke         | Apotheke, Augenarzt                  |
| 46 Allgemeinmedizin | 49 Apotheke                          |
| 47 Zahnarzt         | 50 Allgemeinmedizin, Innere Medizin, |
|                     | Sportmedizin, Orthopäde              |

**Internet, Geldtransfer**  
internet, money transfer  
internet, transfer d'argent

انترنت , حواله

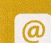

- |                       |                 |
|-----------------------|-----------------|
| 51 Internet/Kopie/Fax | 53 Geldtransfer |
| 52 Internet/Kopie/Fax |                 |

**Elektronik, Handy**  
electronics, mobile phones  
portable, appareils d'électronique

ایلیکٹرونیکس , موبائل

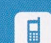

- |                               |                      |
|-------------------------------|----------------------|
| 54 Elektronik An- und Verkauf | 57 Handy Second Hand |
| 55 Elektronik An- und Verkauf | 58 Handy Verkauf     |
| 56 Elektronik An- und Verkauf |                      |

**Sonstiges**  
others  
différentes choses

غیر ہا

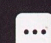

- |                                               |
|-----------------------------------------------|
| 59 Stadtjugendring Oase (Freizeitsportanlage) |
| 60 Spielplatz                                 |
| 61 Waschsalon                                 |
| 62 Waschsalon                                 |
| 63 Hostel                                     |
| 64 Rot-Kreuz-Laden (Second-Hand-Ware)         |
| 65 Agentur für Arbeit                         |
| 66 Deutschkurse (VHS)                         |
| 67 Verein türkischer Eltern in Augsburg e.V.  |
